# Supplementary material
Source: Springer Nature journal article supplement (https://www.springermedizin.de/resource/supplementary/12916_2008_156_MOESM3_ESM.pdf/9599284)
Supplement: MOESM3 [file 9599284]

Week 2005/47

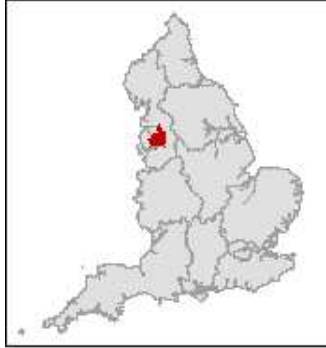

Week 2005/48

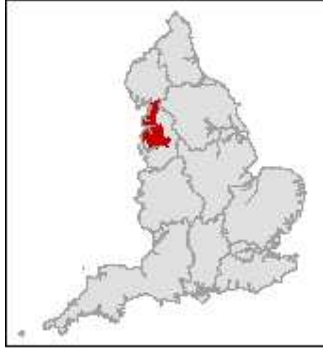

Week 2005/49

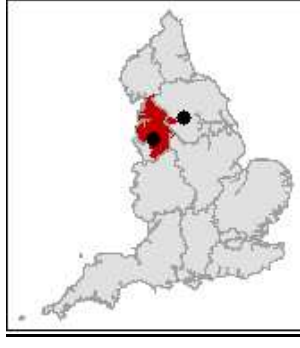

Week 2005/50

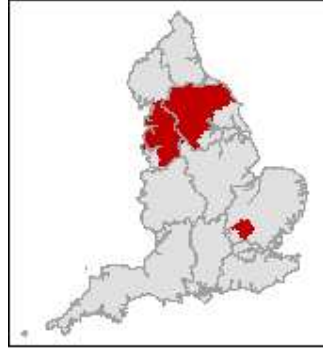

Week 2005/51

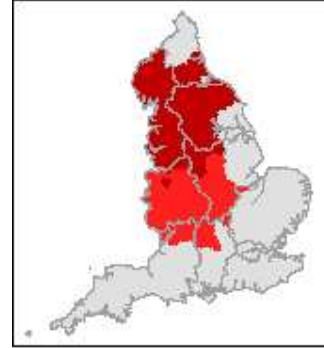

Week 2005/52

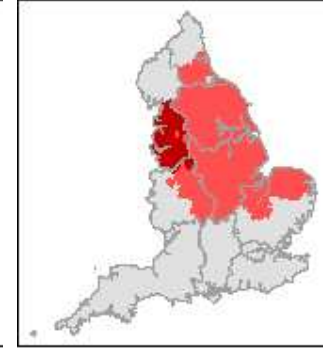

Week 2006/01

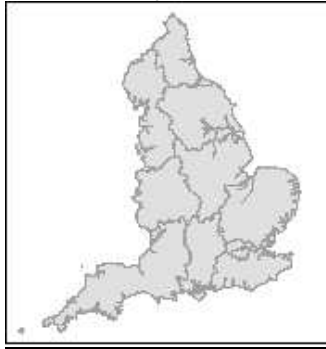

Week 2006/02

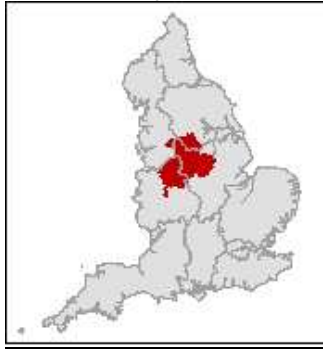

Week 2006/03

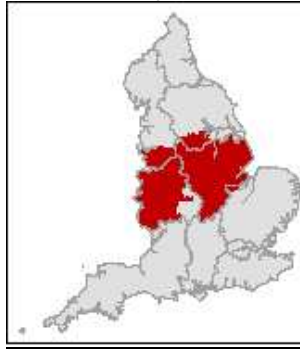

Week 2006/04

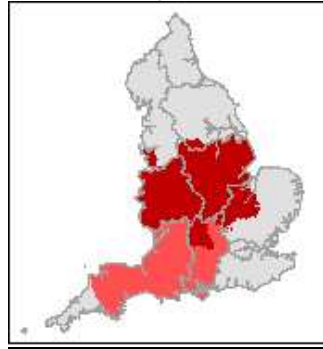

Week 2006/05

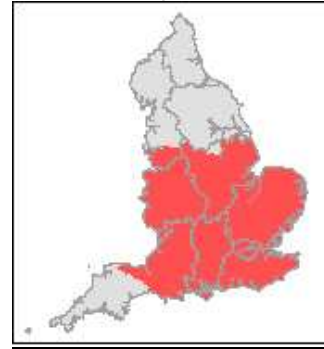

Week 2006/06

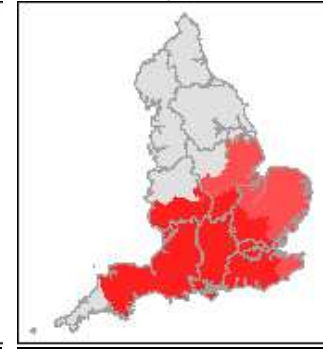

Week 2006/07

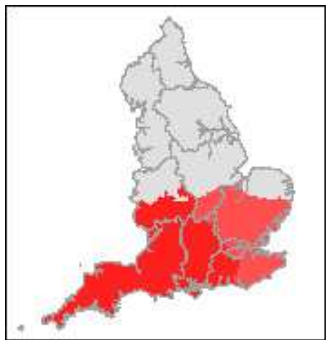

Week 2006/08

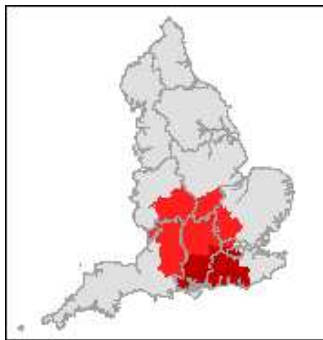

Week 2006/09

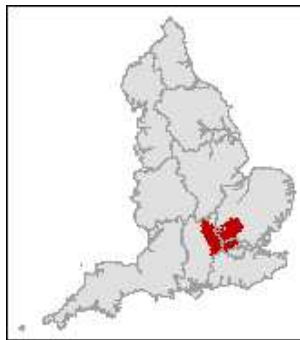

Week 2006/10-13

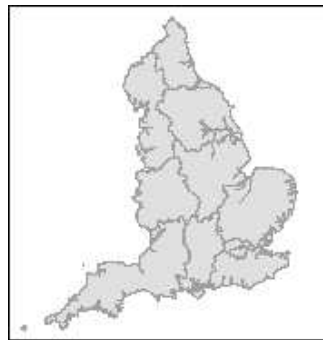

Week 2006/14

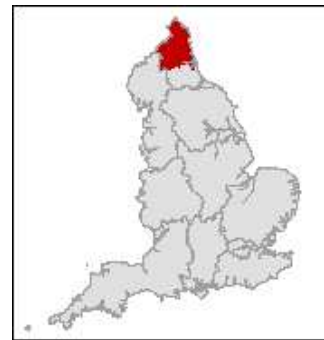

Legend

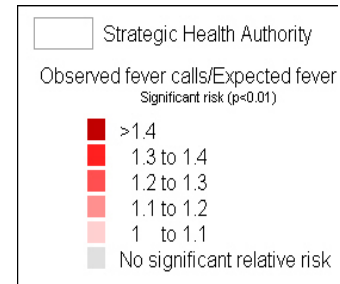

● Early influenza B outbreak
